# Supplementary figures and images for: Altered Nutrient Composition of Lactose-Reduced Infant Formula
Source: MDPI journal article supplement (doi:10.3390/nu16020276), 2024-01-17

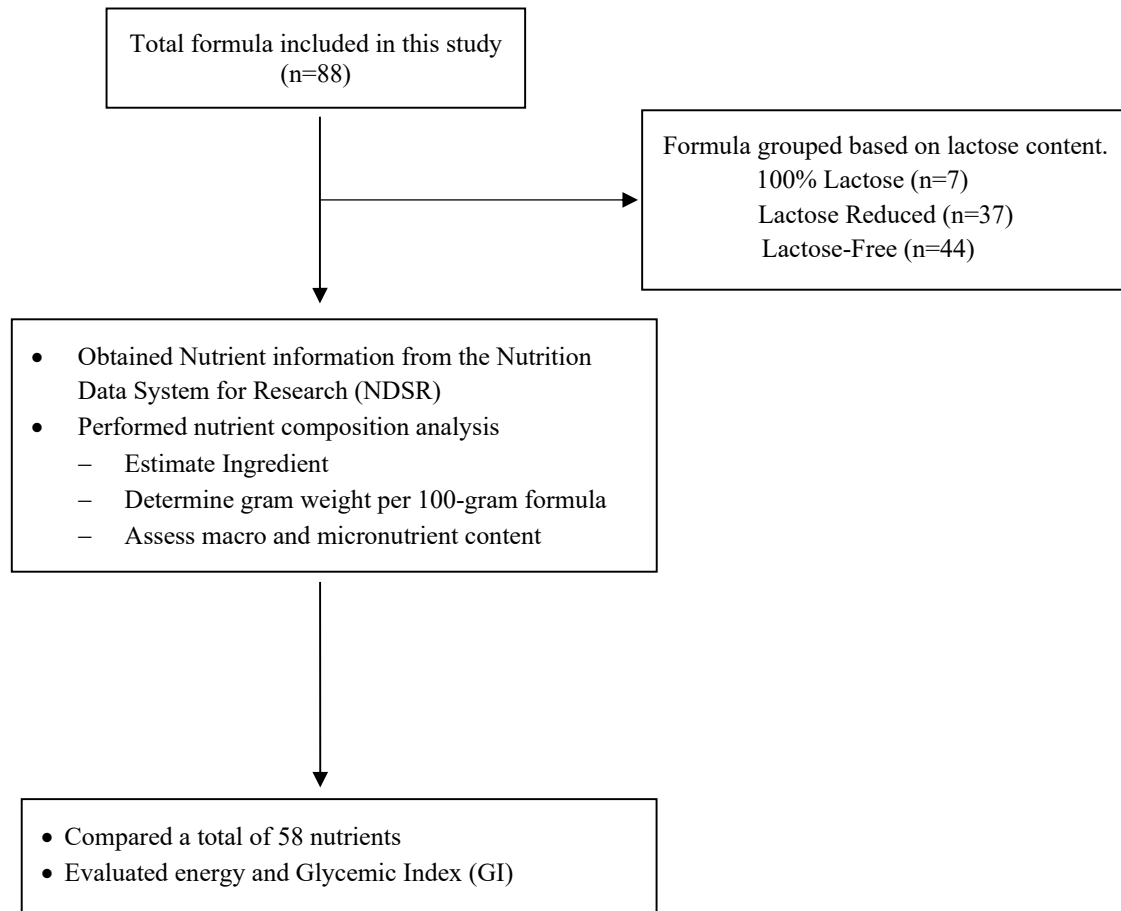

Figure S1. The Flow of Formula categorization and nutrient comparison

Supplement: s1 [file s1]
